# Supplementary material for: HCV RNA Activates APCs via TLR7/TLR8 While Virus Selectively Stimulates Macrophages Without Inducing Antiviral Responses
Source: PubMed Central journal article supplement (PMC4935957; doi:10.1038/srep29447), 2016-07-07
Supplement: srep29447-s1.pdf [file srep29447-s1.pdf]

**HCV RNA Activates APCs via TLR7/TLR8 While Virus Selectively Stimulates  
Macrophages Without Inducing Antiviral Responses**

**Yuwei Zhang<sup>1,3</sup>, Mohamed El-Far<sup>1,2</sup>, Franck P. Dupuy<sup>1,3,5</sup>, Mohamed Salah Abdel-  
Hakeem<sup>1,4</sup>, Zhong He<sup>1,3</sup>, Francesco Andrea Procopio<sup>1,3</sup>, Yu Shi<sup>1,3</sup>, Elias K. Haddad<sup>1,3</sup>,  
Petronela Ancuta<sup>1,2</sup>, Rafick-Pierre Sekaly<sup>1,3,6</sup>, Elias A. Said<sup>\*1,2,7</sup>**

**Supplementary information**

## Supplementary Figure Legends

### **Supplementary Figure S1: STAT1 phosphorylation reveals type I IFN activity in supernatants**

**from HCV ssRNA-exposed monocytes and pDCs but not mDCs.** Monocytes, mDCs, and pDCs were isolated from 3 healthy donors by negative selection using magnetic beads. Cells were stimulated with the newly HCV ssRNA sequence HCVL1 (7.5 µg/ml). Cell-free supernatants (SN) were harvested at 24 h post-stimulation. PBMCs ( $10^6$ /ml) were incubated for 15 min. with SN from monocytes, mDCs, or pDCs that were exposed to medium only (blue), DOTAP alone (Red), or HCV ssRNA-DOTAP complex (Green). Cells were then fixed and stained with anti-phosphorylated STAT1 (Y701) Ab according to the manufacturer's Phosflow protocol (BD Biosciences). Cells were analyzed by flow cytometry for the intracellular expression of phosphorylated STAT1.

### **Supplementary Figure S2: Macrophages but not monocytes produce TNF-α in response HCV**

**particles. (a)** PBMCs ( $10^5$ /200µl) from 3 different donors were incubated with HCV particles (virus/cell ratio of 100), DOTAP alone or HCV RNA-DOTAP complex for 24 h. **(b)** Macrophages or monocytes ( $10^5$ /200µl) were stimulated with HCV particles at a virus/cell ratio of 20 for 24h. TNF-α production was measured by ELISA. Results were generated with cells from twenty different healthy donors. Macrophages **(c)** and monocytes **(d)** were stimulated with HCV particles, medium, CL097 (1µg/ml), polyI:C (30µg/ml) or LPS (1ng/ml) for 24h. Macrophages **(e)** and monocytes **(f)** were stimulated with Sendai virus (200 hemagglutinating units/ml) or CL097 for 24h. Supernatants were harvest at 24 h post-stimulation and TNF-α production was measured by ELISA (n=3).

**Supplementary Figure S3: Both monocyte-derived macrophages and DCs express DC-SIGN but only macrophages are stimulated by HCV particles.** Monocytes were cultured in the presence

of GM-CSF or GM-CSF/IL-4 for 6 days to generate macrophages and MDDCs, respectively. (a-b) DC-SIGN expression on macrophages and DCs was measured by flow cytometry. Shown are representative results generated with cells from one donor (a) and statistical analysis of DC-SIGN MFI expression on cells from 3 different donors (b, c) Macrophages and MDDCs ( $10^5/200\mu\text{l}$ ) were stimulated with HCV particles at a virus/cell ratio of 20, or with CL097 ( $1\mu\text{g/ml}$ ) or Sendai virus (200 hemagglutinating units/ml) for 24h. TNF- $\alpha$  production was measured by ELISA. Results represent mean  $\pm$  SD of values generated with cells from three different donors.

**Supplementary Table S1: Novel GU-rich sequences in the HCV genome.** GU-rich ssRNA sequences were analyzed within HCV genome based on the sequence of JFH-1 strain. Nine sequences (HCVL1 to HCVL9) that contain around 65% G/U or more were selected.

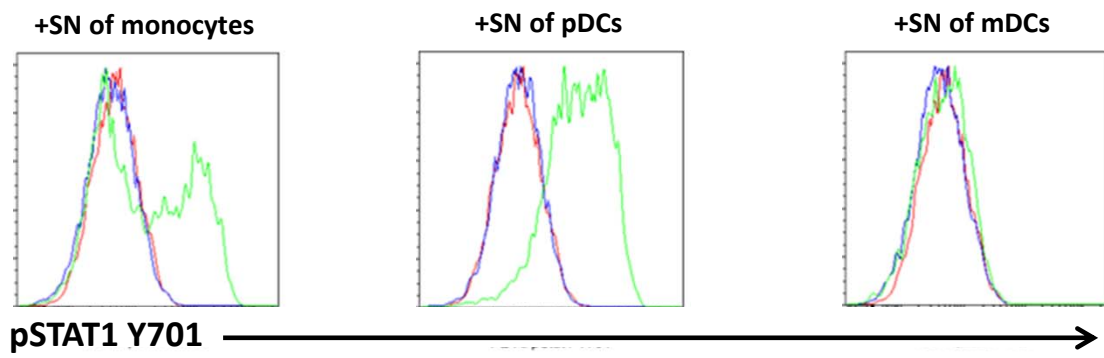

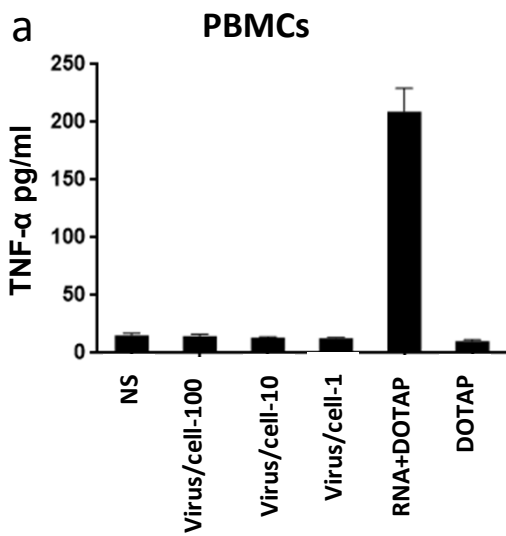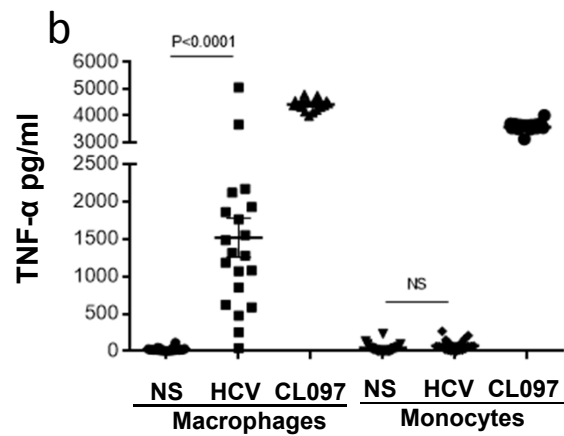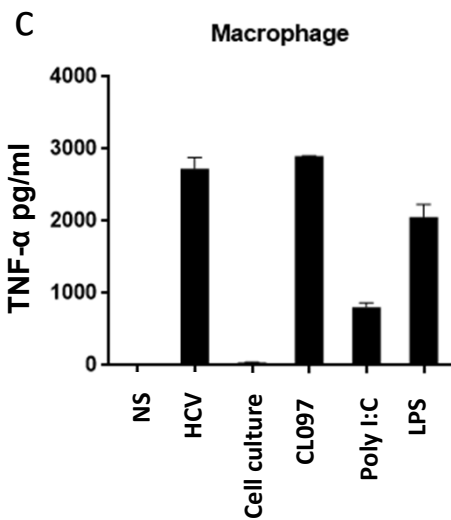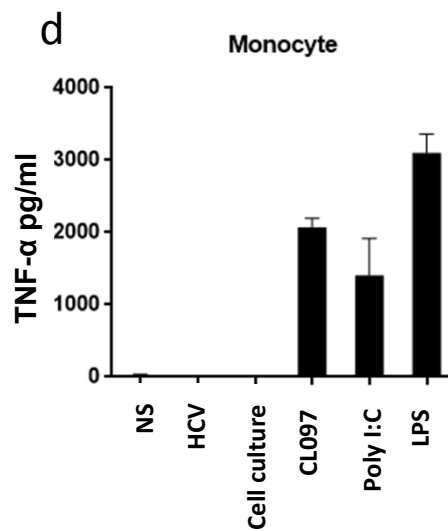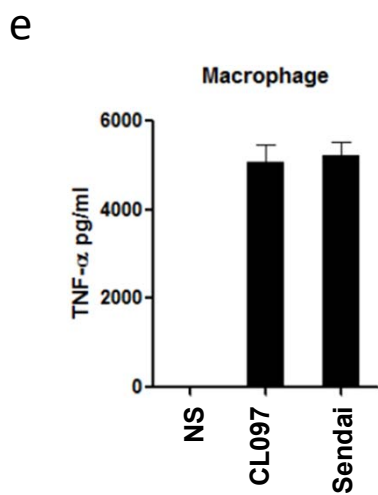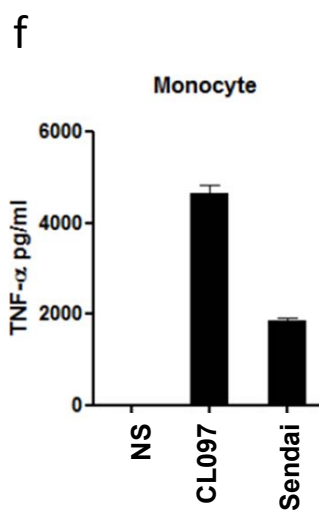

a

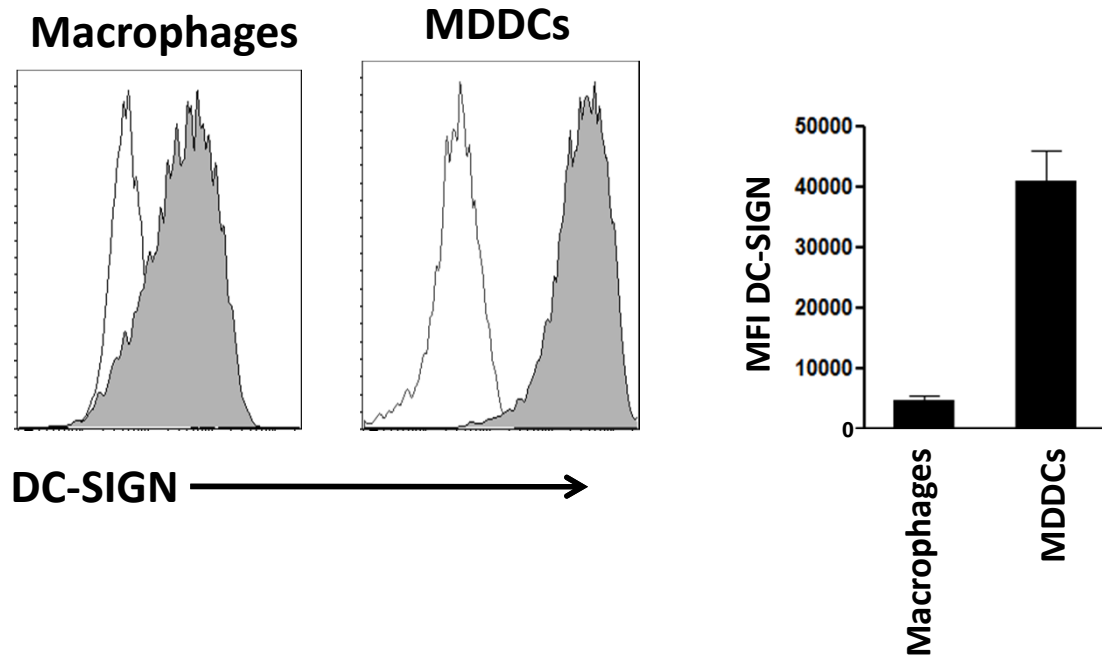

b

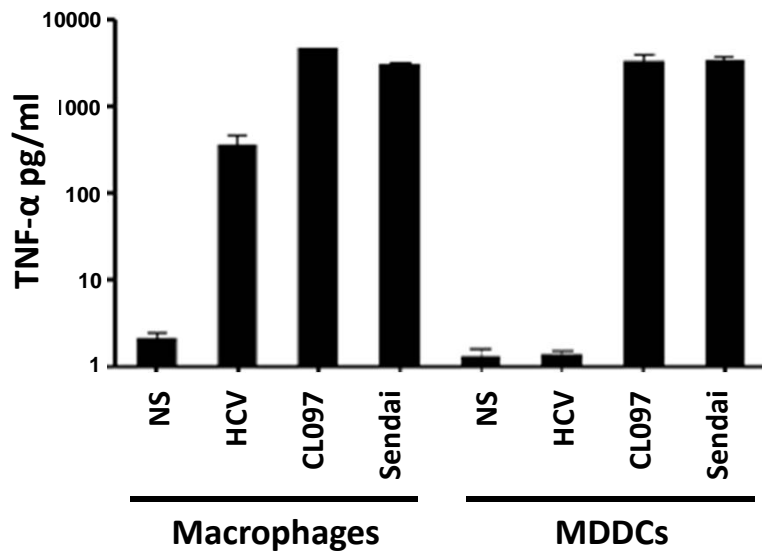

## Supplemental Table S1

| <b>ID</b>    | <b>RNA sequences</b>                                          | <b>Regions</b> |
|--------------|---------------------------------------------------------------|----------------|
| <b>HCVL1</b> | GUAGUGUUGGGUCGCGAAAGGCCUUGUGGU                                | 5'UTR          |
| <b>HCVL2</b> | GUCAAGUCCCCGGGUGGCGGUCAGAUCGUUGGUGGAGUUUACUUGUUG              | Core           |
| <b>HCVL3</b> | UGUGCGGGUCUGUCUUUCUUGUUGGUCAACUGUUUACCUU                      | E1             |
| <b>HCVL4</b> | UUGUGGACGUGCAGUACUUGUACGGGGUAGGGU                             | E2             |
| <b>HCVL5</b> | GUCUUGUGUCCUCCUCGUGUUCUUCUGCUUUGCGUGGUAUCUGAAGG<br>GUAGGUGGGU | p7             |
| <b>HCVL6</b> | GUCUUGUGUCCUCCUCGUGUUCUUCUGCUUUGCGUGGU                        | p7             |
| <b>HCVL7</b> | GUGGCCGCGUCGUGUGGCGGCGUUGUUCUUGUCGGGUU                        | NS2            |
| <b>HCVL8</b> | GUUGUCGUCGUGUCGACCGA                                          | NS3            |
| <b>HCVL9</b> | GUGUGUGGCGACGACUUAGUCGUUAUCUGUGAAAGUG                         | NS5B           |
